# Supplementary material
Source: PubMed Central journal article supplement (PMC3606699)
Supplement: 13280_2012_352_MOESM1_ESM.pdf [file 13280_2012_352_MOESM1_ESM.pdf]

## **Appendix S1**

### **A Checklist for Key Informants**

#### **(MPA Managers/Staff, Environmentalist and Administrators)**

1. Relevancy of policies, management objectives, legislations, regulations, rules and management procedures governing natural/park's resources, conservation and their implementations.
2. Local community concerns on the presence of MPA in their jurisdiction and their involvement
3. The drivers are defined as “any natural or human-induced factor that directly or indirectly brings about change in ecosystem or MPA production systems”. They can be Social, Technological, Economic, Environmental, Political and Values. Awareness of major ecosystem drivers of change to the sub-systems or MPA ecosystem
4. Effects of the drivers of change to the ecosystem and its services as well as human well-being
5. Management problems which are faced by the MPA and their underlying causes
6. Strategies to improve management of the Park, if any.
7. Effectiveness (success and failures) of the MPA in addressing the drivers of ecosystem change in order to maintain a balance between resource conservation and use
8. The relevance of MPA towards achieving objectives related to conservation, human well being of local communities and wise use of resources
9. Relationship of MPAs with other institutions within and outside of its jurisdiction.
10. Any variations in conservation approaches among existing institutions in terms of policies, actions and outcomes? If yes, what could be their causes?

11. Institutional adjustments that could enable local communities and stakeholders to manage and utilize MPA resources in a more effective ways?
12. Any future plans for the MPA or other conservation institutions to improve their operations
13. The problems hindering the MPA operations and implementations, what could be the suggestions/solutions for improvement?
14. How would you assess the government and stakeholders' commitment and acceptance of the MPA in terms of the following; reflections in policies and Acts, budget support and implementation of various activities including facilitations
15. Issues and trends over the past 20 years that have had the greatest impact on the management of natural resources and development of fisheries/MPAs
16. How could the negative outcomes be avoided or rather addressed for effective implementation of MPA activities?
17. Type or relevant policies that are needed for effective implementation of MPA activities in order to meet its objectives
18. Opinions if MPA is a sustainable modal for managing coastal and marine resources
19. Any other comments/remarks related to MPA setup/implementation
