# Supplementary material
Source: PubMed Central journal article supplement (PMC3606699)
Supplement: 13280_2012_352_MOESM2_ESM.pdf [file 13280_2012_352_MOESM2_ESM.pdf]

**Questionnaire for Household Survey**

|                   |  |
|-------------------|--|
| Questionnaire No. |  |
| Village           |  |
| Enumerator        |  |
| Date              |  |

**1.0 HOUSEHOLD DATA**

1.1 Name of the household head .....

1.2 Gender

- 1. Male
- 2. Female

1.3 Marital status

- 1. Single
- 2. Married
- 3. Divorced
- 4. Widowed

1.4 Age of the household head ..... years

1.5 Household composition

| Age (years) | Male | Female |
|-------------|------|--------|
| < 18        |      |        |
| 18 – 55     |      |        |
| > 55        |      |        |

1.6 Level of Education

- 1. None
- 2. Adult literacy
- 3. Standard IV
- 4. Standard V – VII/VIII
- 5. Secondary Education
- 6. Others (specify)

1.7 Major source of income/livelihood .....

1. Fishing
2. Agriculture
3. Forestry products
4. Business
5. Others (Specify)

1.8 Estimated annual income .....

1.9 Is there any change of income (increase or decrease) since the MPA was established?

1. Yes
2. No

1.9.1 If yes, give details what could be the reason.....

1.10 Residence duration in the village ..... years

## **2. LAND USE**

2.1 Do you own land?

1. Yes
2. No

2.1.1 If yes, how many hectares and how do you own your land?

1. Communal
2. Private
3. Others (Specify)

2.2 What system of growing plants do you apply?

1. Permanent
2. Shifting

2.3 Since you are living in the MPA, are there any arrangements which abide you to use your own land?

1. Yes
2. No

2.4 If yes, what are those arrangements?

### 3. ECOSYSTEM DRIVERS

3.1 The drivers of ecosystem change are defined as ‘any natural or human-induced factor that directly or indirectly brings about change in ecosystem or MPA production systems’. They can be Social, Technological, Economic, Environmental, Political and Values. Drivers alter the future production of ecosystem in significant ways. Do you know the drivers which cause effect and/or change to an MPA biodiversity/ecosystem?

1. Yes
2. No

3.1.1 If yes, among of the mentioned below which are the drivers affecting ecosystem in your area? Rank their effects (i.e.; very high .....no effects).

| Drivers of ecosystem change                                                                                                                         | Status of the driver’s effects |     |          |      |           | Effects of the drivers on ecosystem & human well-being |            |
|-----------------------------------------------------------------------------------------------------------------------------------------------------|--------------------------------|-----|----------|------|-----------|--------------------------------------------------------|------------|
|                                                                                                                                                     | No effects                     | Low | Moderate | High | Very high | Ecosystem                                              | Well-being |
| <u>Demographic (Population)</u><br>- Local people migration<br>- Tourists<br>- Fishers<br>- Investors / Developers                                  |                                |     |          |      |           |                                                        |            |
| <u>Science &amp; Technology</u><br>-Industrial development<br>- Oil & gas exploration projects<br>-Education & Research programs<br>-Harbour / port |                                |     |          |      |           |                                                        |            |
| <u>Socio - political</u>                                                                                                                            |                                |     |          |      |           |                                                        |            |

|                                                                                                                                                                |  |  |  |  |  |  |  |
|----------------------------------------------------------------------------------------------------------------------------------------------------------------|--|--|--|--|--|--|--|
| - Multi-party system<br>- Political pressure                                                                                                                   |  |  |  |  |  |  |  |
| <u>Economic</u><br>- Increase in income<br>- Resource dependence                                                                                               |  |  |  |  |  |  |  |
| <u>Cultural &amp; Religious</u><br>-Traditional practices<br>- Inspirations                                                                                    |  |  |  |  |  |  |  |
| <u>Harvest of resources &amp; Consumption</u><br>- Over-harvesting<br>- Use of destructive gear                                                                |  |  |  |  |  |  |  |
| <u>Climate change</u><br>-Coral bleaching<br>-Sea level rise<br>- Floods                                                                                       |  |  |  |  |  |  |  |
| <u>Technological Adaptations</u><br><u>Land use</u><br>- Use of fertilizers<br>- Oil spills/Pollution<br>- Introduction and transfer of invasive alien species |  |  |  |  |  |  |  |

|                                                         |  |  |  |  |  |  |  |
|---------------------------------------------------------|--|--|--|--|--|--|--|
| <u>Change in local land use &amp; Cover degradation</u> |  |  |  |  |  |  |  |
| -Mangrove                                               |  |  |  |  |  |  |  |
| - Coastal forest                                        |  |  |  |  |  |  |  |
| - Shifting cultivation                                  |  |  |  |  |  |  |  |

**4.0 EFFECTIVENESS/IMPACTS OF MPA**

4.1 Does the MPA effective in addressing the drivers of ecosystem change to maintain a balance between resource use and conservation

- 1. Yes
- 2. No

4.1.1 If yes what were the reasons behind it?

4.2 Are people benefiting from an MPA’s marine resources?

- 1. Yes
- 2. No

4.2.1 If yes, who are the beneficiaries?

- 1. Local Community members
- 2. MPA staff
- 3. Village leaders
- 4. Others

4.3 What is the benefit sharing mechanism in place?

- 1. Regulation and rules
- 2. Decision based on the existing needs
- 3. None

## 5.0 MPA RESOURCES USE

5.1 What are the major traditional uses of the following marine resources?

| Type of resource      | Uses |
|-----------------------|------|
| 1. Mangroves          |      |
| 1. Corals             |      |
| 2. Sea grass beds     |      |
| 3. Sand dunes         |      |
| 4. Estuarine          |      |
| 5. Coastal/sea waters |      |
| 6. Fish               |      |
| 7. Coastal forests    |      |
| 9. Other resources    |      |

5.2 How do people get access to the Marine Park's resources?

1. Free
2. Permission
3. Fee

5.3 If local community members benefit from resources, do they contribute anything on conservation?

1. Yes
2. No

5.3.1 If yes how do they contribute?

5.4 Are there any current changes of people's attitude and perceptions towards resource use when you compare with the past?

1. Yes
2. No

5.4.1 If yes what are those changes in relation to the following?

1. Adherence to use zones
2. Compliance to regulations and rules
3. Mentality of ownership to resources

5.5 Are you engaging in fishing activities?

1. Yes
2. No

5.5.1 If yes, how often are you going fishing?

1. Every day
2. Twice a week
3. Occasional
4. Others specify

5.6 What makes you to engage in fishing activities?

1. Subsistence
2. Commercial purpose
3. Both purposes
4. Others, please specify

5.7 How much fish do you catch per day/week?

| Purpose                    | Quantity (Kg) | Value Tanzanian Shillings. |
|----------------------------|---------------|----------------------------|
| Total Catch                |               |                            |
| Food/household subsistence |               |                            |
| Sale                       |               |                            |
| Other uses                 |               |                            |

5.8 What type of fishing gear do you possess?

5.9 Do you think the gear you possess is helping you to catch enough fish?

5.10 If yes, why? .....

## 6.0 MANAGEMENT/CONSERVATION EFFORTS IN MPA

6.1 Do you know the objectives of MPA?

1. Yes
2. No

6.1.1 If yes, mention them

- 1.....
- 2.....
- 3.....

6.2 Are you aware of different activities performed by MPA?

1. Yes
2. No

6.2.1 If yes list them.....

6.3 Who owns the MPA?

1. Government
2. Village
3. Both village and government
4. None



6.4 Do you know the MPA boundaries and use zones?

1. Yes
2. No

6.5 What is your opinion about the progress of the MPA?

1. Very progressive
2. Reasonably progressive
3. Slightly progressive
4. Not progressive

6.7 Are community members involved in conservation/management of MPA's resources?

1. Yes
2. No

6.7.1 If yes, I would like to have your opinions on the following levels of community participation in the MPA conservation/management

| Level                                   | Opinion           |              |                |            |
|-----------------------------------------|-------------------|--------------|----------------|------------|
|                                         | Very satisfactory | Satisfactory | Unsatisfactory | No opinion |
| 1. Decision making                      |                   |              |                |            |
| 2. Implementation of various activities |                   |              |                |            |
| 3. Benefit sharing                      |                   |              |                |            |
| 4. Monitoring and evaluation            |                   |              |                |            |

6.8 Does the MPA compensating local communities' time for participating in implementation of various conservation activities?

1. Yes
2. No

6.8.1 If yes, are local community members participating in those activities in order to earn money or is there any other motives behind?

6.9 Are there any other institutions participating in MPA resources conservation/management?

1. Yes
2. No

6.9.1 If yes, mention those institutions?

1. ....
2. ....
3. ....

6.10 Do you think MPA should continue to involve community in managing its resources?

1. Yes
2. No

6.10.1 If yes, why do you think so?

6.11 Can you mention some achievements or success of the MPA in managing natural resources?

6.12 The following are common challenges or problems encountered by the MPA's in the country can you tell the level of their effects if you aware of them?

|                                                 | VERY LOW | LOW | HIGH | VERY HIGH |
|-------------------------------------------------|----------|-----|------|-----------|
| Pressure on Resources                           |          |     |      |           |
| Use Zone Demarcation                            |          |     |      |           |
| Budget Constraints                              |          |     |      |           |
| Inadequate Support from Government Institutions |          |     |      |           |
| Inadequate Human Resources                      |          |     |      |           |
| Communication Break Down                        |          |     |      |           |
| False Promises                                  |          |     |      |           |
| Inadequate Capacity , Knowledge & Experiences   |          |     |      |           |

## 7. LEGISLATIONS AND REGULATIONS

7.1 Are there any legislations, regulations, rules and management procedures governing resource conservation and use?

1. Yes
2. No

7.1.1 If yes, mention them

7.2 How effective are they?

7.3 Are you aware of any illegal practices?

1. Yes
2. No

7.3.1 If yes, how did you know?

1. Village public meetings
2. Fellow community members
3. MPA/Fisheries staff
4. Patrols
5. Physical observations

7.4 Are community members participating in enforcement of legislations and regulations?

1. Yes
2. No

7.4. 1 If yes, how?

7.5 Are there any institutions participating in enforcement of existing legislations and regulations or management of the Park's resources?

1. Yes
2. No

7.5.1 If yes mention them

7.6 Are there any changes in fishing gear after establishment of an MPA?

1. Yes
2. No

7.6.1 If yes, why? .....

7.7 Does the legislation/regulations impact on the following aspects?

| Aspect              | Statistics (increase, decrease or no changes) | Clarification |
|---------------------|-----------------------------------------------|---------------|
| Fish catch          |                                               |               |
| Level of compliance |                                               |               |
| Dynamites/blast     |                                               |               |
| Destructive gear    |                                               |               |
| Mangrove harvesting |                                               |               |
| Turtle nesting      |                                               |               |
| Turtle killing      |                                               |               |
| Migration Cetaceans |                                               |               |
| Coral mining        |                                               |               |
| Tourism             |                                               |               |

7.8 Do you know the role and functions of Village Liaison Committees (VLCs)

1. Yes
2. No

7.9 If yes, mention them.....

**8. LESSONS LEARNT AND EXPERIENCES GAINED**

8.1 Do you have any interested story, lesson or experience gained over MPA implementation, which you may wish to share with others?

8.2 What factors should be addressed for effective implementation of MPA activities?

8.3 Do you have any other comments/remarks?
